# Supplementary material for: Effects of erector spinae plane block on perioperative hemodynamic stability, blood loss, and postoperative pain in transforaminal lumbar interbody fusion
Source: Research Square preprint supplement (doi:10.21203/rs.3.rs-5811911/v1), 2025-01-20
Supplement: Supplementary file 1 [file 3d78baf0fa733457b199f99d.xlsx]

## Sheet: ESPB 60
ESPB	Max_MAP	Min_MAP	MAP_D	MAP_SD	MAP_Mean	CoV_MAP	Morphine_POR	Morphinr_Ward	Foley_Rm_POD	IV_Off_POD	MBD_POD	POR_Pain	POD1_Pain	MBD_Pain	birth	Age	OP_level	Sex	complication	ASA	CCI	HTN	Blood_loss	OP_time	Blood_loss_level	OP_time_level
1	84.6	65.8	18.8	5.4	73	7.4	5	0	2	1	6	6	2	2	1963-05-26	59.6811	3	0	0	2	2	1	250	239	83.3333	79.6667
1	74.4	51.8	22.6	5.2	60.7	8.6	0	0	2	1	7	2	1	1	1932-11-28	90.1698	3	0	0	2	5	1	50	169	16.6667	56.3333
1	93.4	69.8	23.6	5.9	78.2	7.6	5	0	1	1	3	7	3	2	1990-12-23	32.1027	2	0	0	3	0	0	150	144	75	72
1	86.7	61	25.7	7.6	78.1	9.7	0	0	1	1	4	2	2	2	1964-08-17	58.4518	2	0	0	2	0	0	100	119	50	59.5
1	91.9	64.8	27.1	9	75.4	11.9	0	0	1	1	5	3	2	2	1968-03-01	54.9145	3	0	0	2	1	0	150	125	75	62.5
1	99.4	67	32.4	7.4	78.5	9.5	0	0	5	1	6	2	2	2	1947-08-22	75.4402	2	0	0	3	1	1	100	139	50	69.5
1	91.9	56.6	35.3	7.8	71.4	10.9	8	0	1	1	5	8	3	3	1954-12-15	68.1246	3	0	0	3	1	0	100	163	33.3333	54.3333
1	117.6	82.1	35.5	9.2	98.4	9.3	5	0	2	1	5	4	3	3	1968-01-09	55.0569	3	0	0	3	3	1	300	180	75	45
1	101.4	65.3	36.1	9.8	85.4	11.4	5	0	1	1	5	7	3	2	1954-01-01	69.0774	3	1	0	3	4	1	200	159	100	79.5
1	103.6	64.5	39.1	9.3	81.8	11.4	5	0	2	2	5	5	2	1	1950-10-11	72.3026	5	0	0	3	2	0	450	217	150	72.3333
1	109.6	68.3	41.3	14	87.8	16	0	0	1	1	4	1	1	2	1946-06-19	76.6147	2	1	0	2	2	1	250	179	83.3333	59.6667
1	90.3	47.6	42.7	9.5	66.1	14.4	10	0	2	1	4	8	2	2	1953-04-15	69.792	2	1	0	3	4	1	300	195	100	65
1	105.3	61.3	44	11.3	76.5	14.7	12	0	2	2	7	8	2	2	1949-02-01	73.9919	3	0	0	3	4	1	450	169	150	56.3333
1	121	74.6	46.4	12.7	93.1	13.7	5	0	3	5	9	7	2	1	1954-11-06	68.2314	3	1	0	3	3	1	350	242	70	48.4
1	104.9	57.6	47.3	11.8	81.4	14.5	5	0	1	1	5	8	3	2	1972-01-29	51.0021	2	1	0	3	4	1	200	112	100	56
1	104.7	56.3	48.4	9.2	75.8	12.1	0	0	2	2	5	2	2	2	1971-08-20	51.4457	3	1	0	3	6	1	400	153	200	76.5
1	130.3	79.1	51.2	12.5	95.8	13	10	0	2	2	5	9	2	2	1952-01-13	71.0459	2	1	0	2	2	0	250	119	125	59.5
1	117.8	65.9	51.9	10	77.3	12.9	7	0	1	1	4	9	2	2	1960-01-30	62.9994	3	0	0	3	3	1	200	159	66.6667	53
1	126	65.3	60.7	16.3	83.1	19.6	0	0	2	2	5	2	2	2	1967-01-05	56.0671	2	0	0	2	3	1	600	166	200	55.3333
1	124.6	54.7	69.9	14.3	94.4	15.1	5	0	1	3	6	7	2	2	1945-09-28	77.3375	2	1	0	2	1	0	50	152	25	76
1	138.3	64.9	73.4	18.8	95.3	19.7	13	0	1	1	6	9	2	2	1987-04-06	35.818	2	0	0	2	1	0	200	206	66.6667	68.6667
1	96.7	59.8	36.9	10.3	77.9	13.2	4	0	2	2	6	5	3	2	1949-11-13	73.67	3	1	0	2	0	0	150	119	75	59.5
1	104	45.4	58.6	14.3	80.6	17.7	0	0	2	2	5	3	3	2	1972-08-14	50.92	2	1	0	3	3	1	450	192	225	96
1	93	65.8	27.2	7.8	78.6	9.9	0	0	2	2	6	3	2	2	1952-01-02	71.58	4	1	0	3	3	1	800	252	266.667	84
1	107.3	63.6	43.7	11.1	80.4	13.8	0	0	2	2	6	2	3	2	1963-12-06	59.67	2	1	0	2	1	0	500	241	166.667	80.3333
1	126.2	60.7	65.5	16.8	75.9	22.2	0	0	2	2	4	2	2	2	1956-08-15	66.92	2	1	0	2	1	0	350	138	175	69
1	109.6	59.2	50.4	10.4	74.9	13.8	0	0	2	2	5	3	3	2	1982-02-24	41.42	2	0	0	3	1	1	150	178	75	89
1	99.6	75.4	24.2	7.2	86.7	8.3	0	0	1	2	5	3	2	2	1979-02-04	44.5	2	0	0	2	2	1	50	126	25	63
1	111.5	86.3	25.2	7.6	96.9	7.8	0	0	2	2	4	2	2	2	1964-10-21	58.75	2	0	0	3	4	1	200	154	100	77
1	106.3	53.7	52.6	11.2	75.8	14.7	0	0	2	2	5	3	3	3	1967-02-02	56.6	3	1	0	2	0	1	300	177	150	88.5
2	102.8	65.2	37.6	7.8	84.7	9.2	5	0	3	3	4	8	3	2	1947-10-20	75.2786	3	1	0	3	4	1	800	204	266.667	68
2	109.2	71.3	37.9	9.4	90.5	10.3	5	0	2	2	4	9	2	1	1967-11-20	55.1938	3	1	0	3	1	0	300	153	100	51
2	97	56.6	40.4	10.2	80.6	12.7	5	0	2	3	4	5	3	1	1952-08-19	70.4463	2	1	0	3	3	0	350	164	175	82
2	99.7	58.6	41.1	10.3	75.6	13.6	4	0	3	2	4	6	2	2	1951-03-16	71.8755	3	0	0	3	3	0	400	179	133.333	59.6667
2	128	85.8	42.2	10.3	96.6	10.7	5	0	3	3	3	10	3	3	1976-05-19	46.6982	2	1	0	2	0	0	150	169	75	84.5
2	104.9	62.6	42.3	10.3	73.3	13.3	5	20	5	5	6	7	3	2	1957-11-24	65.1814	3	1	1	3	3	1	300	206	100	68.6667
2	103.2	60.1	43.1	10.2	81.5	12.5	0	0	#NULL!	3	4	3	3	3	1951-10-10	71.306	3	0	0	3	5	1	50	200	16.6667	66.6667
2	108.5	65.2	43.3	13.5	83.5	16.2	5	0	3	4	4	8	2	2	1961-10-18	61.2827	2	1	0	1	2	0	200	150	100	75
2	99	55.5	43.5	9.8	69.2	14.2	5	10	2	2	3	6	3	2	1953-09-17	69.3676	3	1	0	3	3	1	600	171	200	57
2	114.1	70.3	43.8	12.8	91.9	13.9	5	0	1	2	3	8	3	3	1974-08-08	48.4778	2	1	0	3	1	1	200	144	100	72
2	101.8	57.3	44.5	11.4	78	14.6	5	0	1	3	4	6	3	2	1952-07-28	70.5066	3	1	0	3	3	0	400	206	133.333	68.6667
2	118.4	73.2	45.2	13.5	91	14.8	0	0	2	3	3	3	3	2	1963-08-05	59.4867	3	0	0	3	3	0	500	224	166.667	74.6667
2	100.9	55.4	45.5	8.1	75.7	10.6	5	0	2	3	4	8	6	3	1965-11-12	57.2143	3	0	0	3	1	1	1000	212	333.333	70.6667
2	109.9	64	45.9	12.6	81	15.5	0	0	3	3	5	6	2	2	1956-03-23	66.8543	3	1	0	3	4	1	600	227	200	75.6667
2	109.9	64	45.9	10.3	84.9	12.2	5	0	2	4	4	6	3	2	1948-10-16	74.2875	3	1	0	2	2	0	500	143	166.667	47.6667
2	107.6	59.4	48.2	12.7	76.9	16.5	8	0	1	3	4	7	3	2	1952-07-02	70.5778	3	1	0	3	4	1	150	147	50	49
2	127.2	77.7	49.5	13.2	100.8	13.1	5	0	2	4	4	7	3	2	1954-06-20	68.612	2	1	0	3	2	0	400	172	200	86
2	109.2	58.3	50.9	12.9	80.9	15.9	5	0	1	3	3	8	2	2	1953-08-24	69.4333	3	0	0	3	4	0	1000	239	333.333	79.6667
2	112.4	60.6	51.8	11.9	82.7	14.4	4	0	1	2	4	8	3	3	1945-11-30	77.165	3	1	0	3	3	1	300	169	100	56.3333
2	110.1	57.5	52.6	14.2	83.6	17	4	0	3	3	5	9	2	2	1951-04-06	71.818	4	1	0	3	3	0	200	194	50	48.5
2	118.4	65.2	53.2	16.1	86	18.7	5	0	5	6	6	7	3	1	1953-06-11	69.6359	2	1	0	2	3	1	800	165	400	82.5
2	121.6	67.4	54.2	15.1	89	17	5	0	1	3	4	9	2	2	1953-01-13	70.0439	3	0	0	3	4	0	300	135	100	45
2	121.1	64.8	56.3	11.7	83.6	13.9	0	0	3	3	4	3	3	1	1947-10-25	75.265	3	1	0	3	4	0	600	225	200	75
2	121.9	65.4	56.5	13.8	91.9	15	15	0	2	3	4	10	2	1	1954-11-05	68.2342	2	0	0	2	2	0	200	178	100	89
2	116.1	59.3	56.8	14.4	81.8	17.6	10	5	#NULL!	2	6	7	3	2	1958-03-29	64.8392	2	1	0	3	6	0	800	195	400	97.5
2	127.8	64.7	63.1	19.7	94	20.9	2.5	0	2	2	3	6	3	2	1943-01-17	80.0343	3	1	0	3	7	1	550	173	183.333	57.6667
2	127.8	63.9	63.9	19.2	88.9	21.6	10	0	1	3	4	6	3	2	1951-11-01	71.2458	3	0	0	3	3	1	100	178	33.3333	59.3333
2	123.3	59.2	64.1	15.5	84.7	18.3	5	0	3	2	5	6	3	2	1951-10-20	71.2786	3	1	0	3	3	0	300	186	100	62
2	126.9	62.6	64.3	16.5	92.1	18	0	0	1	3	4	3	2	2	1960-02-18	62.9474	3	1	0	3	3	0	300	165	100	55
2	122.1	51.9	70.2	15	82.8	18.1	7	0	1	3	4	7	4	2	1954-04-30	68.7516	4	0	0	3	2	1	450	198	112.5	49.5
